# Supplementary material
Source: Springer Nature journal article supplement (https://www.springermedizin.de/resource/supplementary/13023_2013_761_MOESM2_ESM.pdf/9643014)

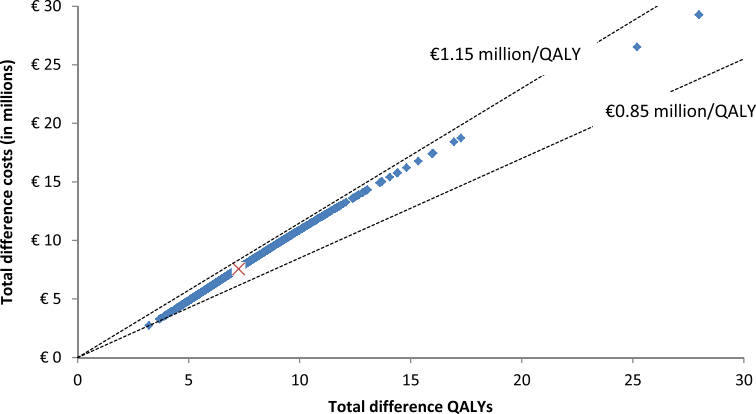

Supplement: MOESM2 [file 9643014]
